# Supplementary material
Source: publisher site journal article supplement (https://static.cambridge.org/content/id/urn:cambridge.org:id:article:S0022112016004973/resource/name/FLM1600497supp.zip)
Supplement: Supplementary file 1 [file FLM1600497supp.zip]

> # The purpose of this supplementary document is to illustrate the key steps required to obtain droplet velocity and shape in the presence of arbitrary Stokes flow, for compound droplets. In section S1 we delineate the MAPLE scripts to evaluate the flow variables for concentric drop theory. Subsequently the script files for specific cases of imposed extensional flow, Poiseuille flow and evaluation of effective viscosity have been appended. Additionally, we have also given the MATLAB script files to evaluate the flow field and the drop migration velocities for eccentric drop configurations.

> # **S1. Calculation of flow field, surfactant concentration, migration velocity and shape deformation for arbitrary Stokes flow**

> restart :

>  $p_{-n-1,1} := A_{-n-1,m} :$

>  $\Phi_{-n-1,1} := B_{-n-1,m} :$

>  $\chi_{-n-1,1} := C_{-n-1,m} :$

>  $p_{n,inf} := \frac{2 \cdot (2 \cdot n + 3)}{n} \cdot \zeta b_{n,m} :$

>  $\Phi_{n,inf} := \frac{1}{n} \cdot \eta b_{n,m} :$

>  $\chi_{n,inf} := \frac{1}{n \cdot (n + 1)} \cdot \psi b_{n,m} :$

>  $p_{-n-1,inf} := \frac{2 \cdot (2 \cdot n - 1)}{n + 1} \cdot \zeta b_{-n-1,m} :$

>  $\Phi_{-n-1,inf} := -\frac{1}{n + 1} \cdot \eta b_{-n-1,m} :$

>  $\chi_{-n-1,inf} := \frac{1}{n \cdot (n + 1)} \cdot \psi b_{-n-1,m} :$

>  $p_{n,2} := \lambda_2 \cdot E_{n,m} :$

>  $\Phi_{n,2} := F_{n,m} :$

>  $\chi_{n,2} := G_{n,m} :$

>  $p_{-n-1,2} := \lambda_2 \cdot E_{-n-1,m} :$

>  $\Phi_{-n-1,2} := F_{-n-1,m} :$

>  $\chi_{-n-1,2} := G_{-n-1,m} :$

> # equations 1 - 7 at the inner interface  $r=1$

> 
$$eq1 := \frac{n}{2 \cdot (2 \cdot n + 3)} \cdot p_{n,inf} + n \cdot \Phi_{n,inf} + \frac{(n + 1)}{2 \cdot (2 \cdot n - 1)} \cdot p_{-n-1,inf} - (n + 1) \cdot \Phi_{-n-1,inf} \\ + \frac{(n + 1)}{2 \cdot (2 \cdot n - 1)} \cdot p_{-n-1,1} - (n + 1) \cdot \Phi_{-n-1,1} = 0 :$$

> 
$$eq2 := \frac{n}{2 \cdot (2 \cdot n + 3) \cdot \lambda_2} \cdot p_{n,2} + n \cdot \Phi_{n,2} + \frac{(n + 1)}{2 \cdot (2 \cdot n - 1) \cdot \lambda_2} \cdot p_{-n-1,2} - (n + 1) \cdot \Phi_{-n-1,2} \\ = 0 :$$

> 
$$eq3 := - \left( \frac{n \cdot (n + 1)}{2 \cdot (2 \cdot n - 1)} \right) \cdot p_{-n-1,1} + (n + 1) \cdot (n + 2) \cdot \Phi_{-n-1,1} + \frac{n \cdot (n + 1)}{2 \cdot (2 \cdot n + 3)} \cdot p_{n,inf} + n$$

$$\begin{aligned}
& \cdot (n-1) \cdot \Phi_{n, \text{inf}} - \left( \frac{n \cdot (n+1)}{2 \cdot (2 \cdot n - 1)} \right) \cdot p_{-n-1, \text{inf}} + (n+1) \cdot (n+2) \cdot \Phi_{-n-1, \text{inf}} \\
& = \frac{n \cdot (n+1)}{2 \cdot (2 \cdot n + 3) \cdot \lambda_2} \cdot p_{n, 2} + n \cdot (n-1) \cdot \Phi_{n, 2} - \left( \frac{n \cdot (n+1)}{2 \cdot (2 \cdot n - 1) \cdot \lambda_2} \right) \cdot p_{-n-1, 2} + (n+1) \\
& \cdot (n+2) \cdot \Phi_{-n-1, 2} :
\end{aligned}$$

$$\begin{aligned}
> \text{eq4} &:= n \cdot (n+1) \cdot \chi_{-n-1, 1} + n \cdot (n+1) \cdot \chi_{n, \text{inf}} + n \cdot (n+1) \cdot \chi_{-n-1, \text{inf}} = n \cdot (n+1) \cdot \chi_{n, 2} + n \\
& \cdot (n+1) \cdot \chi_{-n-1, 2} :
\end{aligned}$$

$$\begin{aligned}
> \text{eq5} &:= - \frac{(n+1)^2 \cdot (n-1)}{2 \cdot n - 1} \cdot p_{-n-1, 1} + 2 \cdot n \cdot (n+1) \cdot (n+2) \cdot \Phi_{-n-1, 1} \\
& - \frac{(n+1)^2 \cdot (n-1)}{2 \cdot n - 1} \cdot p_{-n-1, \text{inf}} + 2 \cdot n \cdot (n+1) \cdot (n+2) \cdot \Phi_{-n-1, \text{inf}} - \frac{n^2 \cdot (n+2)}{2 \cdot n + 3} \cdot p_{n, \text{inf}} \\
& - 2 \cdot (n-1) \cdot n \cdot (n+1) \cdot \Phi_{n, \text{inf}} + \frac{(n+1)^2 \cdot (n-1)}{(2 \cdot n - 1)} \cdot p_{-n-1, 2} - 2 \cdot n \cdot (n+1) \cdot (n+2) \cdot \lambda_2 \\
& \cdot \Phi_{-n-1, 2} + \frac{n^2 \cdot (n+2)}{(2 \cdot n + 3)} \cdot p_{n, 2} + 2 \cdot (n-1) \cdot n \cdot (n+1) \cdot \lambda_2 \cdot \Phi_{n, 2} = -\omega_2 \cdot n \cdot (n+1) \\
& \cdot \Gamma_{12, n, m} :
\end{aligned}$$

$$\begin{aligned}
> \text{eq6} &:= (n-1) \cdot n \cdot (n+1) \cdot \chi_{n, \text{inf}} - n \cdot (n+1) \cdot (n+2) \cdot \chi_{-n-1, \text{inf}} - n \cdot (n+1) \cdot (n+2) \\
& \cdot \chi_{-n-1, 1} - (n-1) \cdot n \cdot (n+1) \cdot \lambda_2 \cdot \chi_{n, 2} + n \cdot (n+1) \cdot (n+2) \cdot \lambda_2 \cdot \chi_{-n-1, 2} = 0 :
\end{aligned}$$

$$\begin{aligned}
> \text{eq7} &:= \frac{n \cdot (n+1)}{2 \cdot (2 \cdot n + 3) \cdot \lambda_2} \cdot p_{n, 2} + n \cdot (n-1) \cdot \Phi_{n, 2} - \frac{n \cdot (n+1)}{2 \cdot (2 \cdot n - 1) \cdot \lambda_2} \cdot p_{-n-1, 2} + (n+1) \cdot (n \\
& + 2) \cdot \Phi_{-n-1, 2} = n \cdot (n+1) \cdot \Gamma_{12, n, m} :
\end{aligned}$$

> # equations 8 - 14 at the outer interface r=R

> # redefining solid harmonics at r=R

$$> p_{n, 3} := \lambda_3 \cdot A_{n, m} \cdot R^n :$$

$$> \Phi_{n, 3} := B_{n, m} \cdot R^n :$$

$$> \chi_{n, 3} := C_{n, m} \cdot R^n :$$

$$> p_{n, 2} := \lambda_2 \cdot E_{n, m} \cdot R^n :$$

$$> \Phi_{n, 2} := F_{n, m} \cdot R^n :$$

$$> \chi_{n, 2} := G_{n, m} \cdot R^n :$$

$$> p_{-n-1, 2} := \lambda_2 \cdot E_{-n-1, m} \cdot R^{-n-1} :$$

$$> \Phi_{-n-1, 2} := F_{-n-1, m} \cdot R^{-n-1} :$$

$$> \chi_{-n-1, 2} := G_{-n-1, m} \cdot R^{-n-1} :$$

$$\begin{aligned}
> \text{eq8} &:= \frac{n \cdot R}{2 \cdot (2 \cdot n + 3) \cdot \lambda_2} \cdot p_{n, 2} + \frac{n}{R} \cdot \Phi_{n, 2} + \frac{(n+1) \cdot R}{2 \cdot (2 \cdot n - 1) \cdot \lambda_2} \cdot p_{-n-1, 2} - \frac{(n+1)}{R} \cdot \Phi_{-n-1, 2} \\
& = (U_{3_{dz}} - U_{2_{dz}}) \cdot f_{1, 0} + (U_{3_{dx}} - U_{2_{dx}}) \cdot f_{1, 1} :
\end{aligned}$$

```

> eq9 :=  $\frac{n \cdot R}{2 \cdot (2 \cdot n + 3) \cdot \lambda_3} \cdot p_{n,3} + \frac{n}{R} \cdot \Phi_{n,3} = (U^3_{dz} - U^2_{dz}) \cdot f_{1,0} + (U^3_{dx} - U^2_{dx}) \cdot f_{1,1} :$ 
=
> eq10 :=  $\frac{n \cdot (n + 1) \cdot R}{2 \cdot (2 \cdot n + 3) \cdot \lambda_2} \cdot p_{n,2} + \frac{n \cdot (n - 1)}{R} \cdot \Phi_{n,2} - \left( \frac{n \cdot (n + 1) \cdot R}{2 \cdot (2 \cdot n - 1) \cdot \lambda_2} \right) \cdot p_{-n-1,2}$ 
 $+ \frac{(n + 1) \cdot (n + 2)}{R} \cdot \Phi_{-n-1,2} - \frac{n \cdot (n + 1) \cdot R}{2 \cdot (2 \cdot n + 3) \cdot \lambda_3} \cdot p_{n,3} - \frac{n \cdot (n - 1)}{R} \cdot \Phi_{n,3} = 0 :$ 
=
> eq11 :=  $n \cdot (n + 1) \cdot (\chi_{n,2} + \chi_{-n-1,2}) - n \cdot (n + 1) \cdot \chi_{n,3} = 0 :$ 
=
> eq12 :=  $-\frac{(n + 1)^2 \cdot (n - 1) \cdot R}{(2 \cdot n - 1)} \cdot p_{-n-1,2} + 2 \cdot n \cdot (n + 1) \cdot \frac{(n + 2)}{R} \cdot \lambda_2 \cdot \Phi_{-n-1,2}$ 
 $- \frac{n^2 \cdot (n + 2) \cdot R}{(2 \cdot n + 3)} \cdot p_{n,2} - \frac{2 \cdot (n - 1) \cdot n \cdot (n + 1)}{R} \cdot \lambda_2 \cdot \Phi_{n,2} + \frac{n^2 \cdot (n + 2) \cdot R}{(2 \cdot n + 3)} \cdot p_{n,3}$ 
 $+ \frac{2 \cdot (n - 1) \cdot n \cdot (n + 1)}{R} \cdot \lambda_3 \cdot \Phi_{n,3} = -\alpha \cdot \delta_2 \cdot n \cdot (n + 1) \cdot \Gamma_{23,n,m} :$ 
=
> eq13 :=  $\lambda_2 \cdot n \cdot (n + 1) \cdot (n - 1) \cdot \chi_{n,2} - \lambda_2 \cdot n \cdot (n + 1) \cdot (n + 2) \cdot \chi_{-n-1,2} - \lambda_3 \cdot n \cdot (n + 1) \cdot (n$ 
 $- 1) \cdot \chi_{n,3} = 0 :$ 
=
> eq14 :=  $\frac{1}{d} \cdot \left( \frac{n \cdot (n + 1)}{2 \cdot (2 \cdot n + 3) \cdot \lambda_3} \cdot p_{n,3} + \frac{n \cdot (n - 1)}{R^2} \cdot \Phi_{n,3} \right) = n \cdot (n + 1) \cdot \Gamma_{23,n,m} :$ 
=
> sol1 := solve( {eq1, eq2, eq3, eq4, eq5, eq6, eq7, eq8, eq9, eq10, eq11, eq12, eq13, eq14},
 $\{A_{n,m}, B_{n,m}, C_{n,m}, A_{-n-1,m}, B_{-n-1,m}, C_{-n-1,m}, E_{n,m}, F_{n,m}, G_{n,m}, E_{-n-1,m}, F_{-n-1,m},$ 
 $G_{-n-1,m}, \Gamma_{12,n,m}, \Gamma_{23,n,m}\} ) :$ 
=
> An,m := simplify(rhs(sol1[1])) :
=
> A-n-1,m := simplify(rhs(sol1[2])) :
=
> Bn,m := simplify(rhs(sol1[3])) :
=
> B-n-1,m := simplify(rhs(sol1[4])) :
=
> Cn,m := simplify(rhs(sol1[5])) :
=
> C-n-1,m := simplify(rhs(sol1[6])) :
=
> En,m := simplify(rhs(sol1[7])) :
=
> E-n-1,m := simplify(rhs(sol1[8])) :
=
> Fn,m := simplify(rhs(sol1[9])) :
=
> F-n-1,m := simplify(rhs(sol1[10])) :
=
> Gn,m := simplify(rhs(sol1[11])) :
=
> G-n-1,m := simplify(rhs(sol1[12])) :
=
> Γ12,n,m := simplify(rhs(sol1[13])) :
=
> Γ23,n,m := simplify(rhs(sol1[14])) :
=
> A-2,0 := simplify(subs(f1,0 = 1, f1,1 = 0, n = 1, m = 0, A-n-1,m)) :
=
> A-2,1 := simplify(subs(f1,0 = 0, f1,1 = 1, n = 1, m = 1, A-n-1,m)) :

```

```

> Ac-2,1 := simplify( subs( f1,0 = 0, f1,1 = 1, U2dx = U2dy, U3dx = U3dy, ζn,m = ζbcn,m, ηbn,m
= ηbcn,n, ψbn,m = ψbcn,m, ζ-n-1,m = ζbc-n-1,m, ηb-n-1,m = ηbc-n-1,n, ψb-n-1,m
= ψbc-n-1,m, A-2,1 ) ) :
=
> ηb1,0 := ηt1,0 - U2dz :
=
> ηb1,1 := ηt1,1 - U2dx :
=
> ηbc1,1 := ηct1,1 - U2dy :
=
> rel1 := A-2,0 = 0 :
=
> rel2 := A-2,1 = 0 :
=
> rel3 := Ac-2,1 = 0 :
=
> E-2,0 := simplify( subs( f1,0 = 1, f1,1 = 0, n = 1, m = 0, E-n-1,m ) ) :
=
> E-2,1 := simplify( subs( f1,0 = 0, f1,1 = 1, n = 1, m = 1, E-n-1,m ) ) :
=
> Ec-2,1 := simplify( subs( f1,0 = 0, f1,1 = 1, U2dx = U2dy, U3dx = U3dy, ζn,m = ζbcn,m, ηbn,m
= ηbcn,n, ψbn,m = ψbcn,m, ζ-n-1,m = ζbc-n-1,m, ηb-n-1,m = ηbc-n-1,n, ψb-n-1,m
= ψbc-n-1,m, E-2,1 ) ) :
=
> rel4 := E-2,0 = 0 :
=
> rel5 := E-2,1 = 0 :
=
> rel6 := Ec-2,1 = 0 :
=
> sol2 := solve( {rel1, rel2, rel3, rel4, rel5, rel6}, {U2dx, U2dy, U2dz, U3dx, U3dy, U3dz} ) :
=
>
=
> #Droplet velocity
=
> U2dx := rhs(sol2[1]) :
=
> U2dy := rhs(sol2[2]) :
=
> U2dz := rhs(sol2[3]) :
=
> U3dx := rhs(sol2[4]) :
=
> U3dy := rhs(sol2[5]) :
=
> U3dz := rhs(sol2[6]) :
=
>
=
> # Inner drop shape
=
> restart :
=
> pn,3 := λ3 · An,m · Rn :
=
> Φn,3 := Bn,m · Rn :
=
> χn,3 := Cn,m · Rn :
=
> pn,2 := λ2 · En,m · Rn :
=
> Φn,2 := Fn,m · Rn :
=

```

```

>  $\chi_{n,2} := G_{n,m} \cdot R^n :$ 
=
>  $p_{-n-1,2} := \lambda_2 \cdot E_{-n-1,m} \cdot R^{-n-1} :$ 
=
>  $\Phi_{-n-1,2} := F_{-n-1,m} \cdot R^{-n-1} :$ 
=
>  $\chi_{-n-1,2} := G_{-n-1,m} \cdot R^{-n-1} :$ 
=
>
=
>  $ns := \frac{2 \cdot (n+1) \cdot (n+2) \cdot \lambda_2 \cdot \Phi_{-n-1,2}}{R^2} - \frac{(n^2 + 3 \cdot n - 1)}{(2 \cdot n - 1)} \cdot p_{-n-1,2}$ 
+  $\frac{2 \cdot n \cdot (n-1) \cdot \lambda_2 \cdot \Phi_{n,2}}{R^2} + \frac{(n^2 - n - 3)}{(2 \cdot n + 3)} \cdot p_{n,2} - \frac{\lambda_3 \cdot 2 \cdot n \cdot (n-1) \cdot \Phi_{n,3}}{R^2}$ 
-  $\frac{(n^2 - n - 3)}{(2 \cdot n + 3)} \cdot p_{n,3} = \omega_1 \cdot \left( \frac{n \cdot (n+1)}{R} - \frac{2}{R} \right) \cdot f_{23,n,m} - \frac{2 \cdot \alpha \cdot \omega_2}{R} \cdot \Gamma_{23,n,m} :$ 
=
>  $f_{23,n,m} := \text{solve}(ns, f_{23,n,m}) :$ 
=
>
=
> # Outer drop shape
=
> restart :
=
>  $p_{-n-1,1} := A_{-n-1,m} :$ 
=
>  $\Phi_{-n-1,1} := B_{-n-1,m} :$ 
=
>  $\chi_{-n-1,1} := C_{-n-1,m} :$ 
=
>  $p_{n,inf} := \frac{2 \cdot (2 \cdot n + 3)}{n} \cdot \zeta_{b_{n,m}} :$ 
=
>  $\Phi_{n,inf} := \frac{1}{n} \cdot \eta b_{n,m} :$ 
=
>  $\chi_{n,inf} := \frac{1}{n \cdot (n+1)} \cdot \psi b_{n,m} :$ 
=
>  $p_{-n-1,inf} := \frac{2 \cdot (2 \cdot n - 1)}{n+1} \cdot \zeta_{b_{-n-1,m}} :$ 
=
>  $\Phi_{-n-1,inf} := -\frac{1}{n+1} \cdot \eta b_{-n-1,m} :$ 
=
>  $\chi_{-n-1,inf} := \frac{1}{n \cdot (n+1)} \cdot \psi b_{-n-1,m} :$ 
=
>  $p_{n,2} := \lambda_2 \cdot E_{n,m} :$ 
=
>  $\Phi_{n,2} := F_{n,m} :$ 
=
>  $\chi_{n,2} := G_{n,m} :$ 
=
>  $p_{-n-1,2} := \lambda_2 \cdot E_{-n-1,m} :$ 
=
>  $\Phi_{-n-1,2} := F_{-n-1,m} :$ 
=
>  $\chi_{-n-1,2} := G_{-n-1,m} :$ 

```

$$\begin{aligned}
> ns := & 2 \cdot (n+1) \cdot (n+2) \cdot \Phi_{-n-1,1} - \frac{(n^2+3 \cdot n-1)}{2 \cdot n-1} \cdot p_{-n-1,1} + 2 \cdot (n+1) \cdot (n+2) \\
& \cdot \Phi_{-n-1,inf} - \frac{(n^2+3 \cdot n-1)}{2 \cdot n-1} \cdot p_{-n-1,inf} + 2 \cdot n \cdot (n-1) \cdot \Phi_{n,inf} + \frac{(n^2-n-3)}{(2 \cdot n+3)} \cdot p_{n,inf} \\
& - \lambda_2 \cdot 2 \cdot (n+1) \cdot (n+2) \cdot \Phi_{-n-1,2} + \frac{(n^2+3 \cdot n-1)}{(2 \cdot n-1)} \cdot p_{-n-1,2} - \lambda_2 \cdot 2 \cdot n \cdot (n-1) \cdot \Phi_{n,2} \\
& - \frac{(n^2-n-3)}{(2 \cdot n+3)} \cdot p_{n,2} = (n \cdot (n+1) - 2) \cdot f_{12,n,m} - 2 \cdot \omega_2 \cdot \Gamma l_{2,n,m} :
\end{aligned}$$

$$> f_{12,n,m} := solve(ns, f_{12,n,m}) :$$

>

> **# S1.1. Representative example : Uniaxial extensional flow**

> restart :

$$> p_{-n-1,1} := A_{-n-1,m} :$$

$$> \Phi_{-n-1,1} := B_{-n-1,m} :$$

$$> \chi_{-n-1,1} := C_{-n-1,m} :$$

$$> p_{n,inf} := \frac{2 \cdot (2 \cdot n + 3)}{n} \cdot \zeta b_{n,m} :$$

$$> \Phi_{n,inf} := \frac{1}{n} \cdot \eta b_{n,m} :$$

$$> \chi_{n,inf} := \frac{1}{n \cdot (n+1)} \cdot \psi b_{n,m} :$$

$$> p_{-n-1,inf} := \frac{2 \cdot (2 \cdot n - 1)}{n+1} \cdot \zeta b_{-n-1,m} :$$

$$> \Phi_{-n-1,inf} := -\frac{1}{n+1} \cdot \eta b_{-n-1,m} :$$

$$> \chi_{-n-1,inf} := \frac{1}{n \cdot (n+1)} \cdot \psi b_{-n-1,m} :$$

$$> p_{n,2} := \lambda_2 \cdot E_{n,m} :$$

$$> \Phi_{n,2} := F_{n,m} :$$

$$> \chi_{n,2} := G_{n,m} :$$

$$> p_{-n-1,2} := \lambda_2 \cdot E_{-n-1,m} :$$

$$> \Phi_{-n-1,2} := F_{-n-1,m} :$$

$$> \chi_{-n-1,2} := G_{-n-1,m} :$$

> # equations 1 - 7 at the inner interface r=1

$$\begin{aligned}
> eq1 := & \frac{n}{2 \cdot (2 \cdot n + 3)} \cdot p_{n,inf} + n \cdot \Phi_{n,inf} + \frac{(n+1)}{2 \cdot (2 \cdot n - 1)} \cdot p_{-n-1,inf} - (n+1) \cdot \Phi_{-n-1,inf} \\
& + \frac{(n+1)}{2 \cdot (2 \cdot n - 1)} \cdot p_{-n-1,1} - (n+1) \cdot \Phi_{-n-1,1} = 0 :
\end{aligned}$$

$$> eq2 := \frac{n}{2 \cdot (2 \cdot n + 3) \cdot \lambda_2} \cdot p_{n,2} + n \cdot \Phi_{n,2} + \frac{(n+1)}{2 \cdot (2 \cdot n - 1) \cdot \lambda_2} \cdot p_{-n-1,2} - (n+1) \cdot \Phi_{-n-1,2}$$

= 0 :

$$\begin{aligned} > eq3 := - \left( \frac{n \cdot (n+1)}{2 \cdot (2 \cdot n - 1)} \right) \cdot p_{-n-1,1} + (n+1) \cdot (n+2) \cdot \Phi_{-n-1,1} + \frac{n \cdot (n+1)}{2 \cdot (2 \cdot n + 3)} \cdot p_{n,inf} + n \\ & \cdot (n-1) \cdot \Phi_{n,inf} - \left( \frac{n \cdot (n+1)}{2 \cdot (2 \cdot n - 1)} \right) \cdot p_{-n-1,inf} + (n+1) \cdot (n+2) \cdot \Phi_{-n-1,inf} \\ & = \frac{n \cdot (n+1)}{2 \cdot (2 \cdot n + 3) \cdot \lambda_2} \cdot p_{n,2} + n \cdot (n-1) \cdot \Phi_{n,2} - \left( \frac{n \cdot (n+1)}{2 \cdot (2 \cdot n - 1) \cdot \lambda_2} \right) \cdot p_{-n-1,2} + (n+1) \\ & \cdot (n+2) \cdot \Phi_{-n-1,2} : \end{aligned}$$

$$\begin{aligned} > eq4 := n \cdot (n+1) \cdot \chi_{-n-1,1} + n \cdot (n+1) \cdot \chi_{n,inf} + n \cdot (n+1) \cdot \chi_{-n-1,inf} = n \cdot (n+1) \cdot \chi_{n,2} + n \\ & \cdot (n+1) \cdot \chi_{-n-1,2} : \end{aligned}$$

$$\begin{aligned} > eq5 := - \frac{(n+1)^2 \cdot (n-1)}{2 \cdot n - 1} \cdot p_{-n-1,1} + 2 \cdot n \cdot (n+1) \cdot (n+2) \cdot \Phi_{-n-1,1} \\ & - \frac{(n+1)^2 \cdot (n-1)}{2 \cdot n - 1} \cdot p_{-n-1,inf} + 2 \cdot n \cdot (n+1) \cdot (n+2) \cdot \Phi_{-n-1,inf} - \frac{n^2 \cdot (n+2)}{2 \cdot n + 3} \cdot p_{n,inf} \\ & - 2 \cdot (n-1) \cdot n \cdot (n+1) \cdot \Phi_{n,inf} + \frac{(n+1)^2 \cdot (n-1)}{(2 \cdot n - 1)} \cdot p_{-n-1,2} - 2 \cdot n \cdot (n+1) \cdot (n+2) \cdot \lambda_2 \\ & \cdot \Phi_{-n-1,2} + \frac{n^2 \cdot (n+2)}{(2 \cdot n + 3)} \cdot p_{n,2} + 2 \cdot (n-1) \cdot n \cdot (n+1) \cdot \lambda_2 \cdot \Phi_{n,2} = -\omega_2 \cdot n \cdot (n+1) \\ & \cdot \Gamma_{12,n,m} : \end{aligned}$$

$$\begin{aligned} > eq6 := (n-1) \cdot n \cdot (n+1) \cdot \chi_{n,inf} - n \cdot (n+1) \cdot (n+2) \cdot \chi_{-n-1,inf} - n \cdot (n+1) \cdot (n+2) \\ & \cdot \chi_{-n-1,1} - (n-1) \cdot n \cdot (n+1) \cdot \lambda_2 \cdot \chi_{n,2} + n \cdot (n+1) \cdot (n+2) \cdot \lambda_2 \cdot \chi_{-n-1,2} = 0 : \end{aligned}$$

$$\begin{aligned} > eq7 := \frac{n \cdot (n+1)}{2 \cdot (2 \cdot n + 3) \cdot \lambda_2} \cdot p_{n,2} + n \cdot (n-1) \cdot \Phi_{n,2} - \frac{n \cdot (n+1)}{2 \cdot (2 \cdot n - 1) \cdot \lambda_2} \cdot p_{-n-1,2} + (n+1) \cdot (n \\ & + 2) \cdot \Phi_{-n-1,2} = n \cdot (n+1) \cdot \Gamma_{12,n,m} : \end{aligned}$$

> # equations 8 - 14 at the outer interface r=R

> # redefining solid harmonics at r=R

$$> p_{n,3} := \lambda_3 \cdot A_{n,m} \cdot R^n :$$

$$> \Phi_{n,3} := B_{n,m} \cdot R^n :$$

$$> \chi_{n,3} := C_{n,m} \cdot R^n :$$

$$> p_{n,2} := \lambda_2 \cdot E_{n,m} \cdot R^n :$$

$$> \Phi_{n,2} := F_{n,m} \cdot R^n :$$

$$> \chi_{n,2} := G_{n,m} \cdot R^n :$$

$$> p_{-n-1,2} := \lambda_2 \cdot E_{-n-1,m} \cdot R^{-n-1} :$$

$$> \Phi_{-n-1,2} := F_{-n-1,m} \cdot R^{-n-1} :$$

$$> \chi_{-n-1,2} := G_{-n-1,m} \cdot R^{-n-1} :$$

```

> eq8 := 
$$\frac{n \cdot R}{2 \cdot (2 \cdot n + 3) \cdot \lambda_2} \cdot p_{n,2} + \frac{n}{R} \cdot \Phi_{n,2} + \frac{(n+1) \cdot R}{2 \cdot (2 \cdot n - 1) \cdot \lambda_2} \cdot p_{-n-1,2} - \frac{(n+1)}{R} \cdot \Phi_{-n-1,2}$$

      = (U3dz - U2dz) · f1,0 + (U3dx - U2dx) · f1,1 :
=
> eq9 := 
$$\frac{n \cdot R}{2 \cdot (2 \cdot n + 3) \cdot \lambda_3} \cdot p_{n,3} + \frac{n}{R} \cdot \Phi_{n,3} = (U3_{dz} - U2_{dz}) \cdot f_{1,0} + (U3_{dx} - U2_{dx}) \cdot f_{1,1} :$$

=
> eq10 := 
$$\frac{n \cdot (n+1) \cdot R}{2 \cdot (2 \cdot n + 3) \cdot \lambda_2} \cdot p_{n,2} + \frac{n \cdot (n-1)}{R} \cdot \Phi_{n,2} - \left( \frac{n \cdot (n+1) \cdot R}{2 \cdot (2 \cdot n - 1) \cdot \lambda_2} \right) \cdot p_{-n-1,2}$$

      + 
$$\frac{(n+1) \cdot (n+2)}{R} \cdot \Phi_{-n-1,2} - \frac{n \cdot (n+1) \cdot R}{2 \cdot (2 \cdot n + 3) \cdot \lambda_3} \cdot p_{n,3} - \frac{n \cdot (n-1)}{R} \cdot \Phi_{n,3} = 0 :$$

=
> eq11 := 
$$n \cdot (n+1) \cdot (\chi_{n,2} + \chi_{-n-1,2}) - n \cdot (n+1) \cdot \chi_{n,3} = 0 :$$

=
> eq12 := 
$$-\frac{(n+1)^2 \cdot (n-1) \cdot R}{(2 \cdot n - 1)} \cdot p_{-n-1,2} + 2 \cdot n \cdot (n+1) \cdot \frac{(n+2)}{R} \cdot \lambda_2 \cdot \Phi_{-n-1,2}$$

      - 
$$\frac{n^2 \cdot (n+2) \cdot R}{(2 \cdot n + 3)} \cdot p_{n,2} - \frac{2 \cdot (n-1) \cdot n \cdot (n+1)}{R} \cdot \lambda_2 \cdot \Phi_{n,2} + \frac{n^2 \cdot (n+2) \cdot R}{(2 \cdot n + 3)} \cdot p_{n,3}$$

      + 
$$\frac{2 \cdot (n-1) \cdot n \cdot (n+1)}{R} \cdot \lambda_3 \cdot \Phi_{n,3} = -\alpha \cdot \delta_2 \cdot n \cdot (n+1) \cdot \Gamma_{23,n,m} :$$

=
> eq13 := 
$$\lambda_2 \cdot n \cdot (n+1) \cdot (n-1) \cdot \chi_{n,2} - \lambda_2 \cdot n \cdot (n+1) \cdot (n+2) \cdot \chi_{-n-1,2} - \lambda_3 \cdot n \cdot (n+1) \cdot (n-1) \cdot \chi_{n,3} = 0 :$$

=
> eq14 := 
$$\frac{1}{d} \cdot \left( \frac{n \cdot (n+1)}{2 \cdot (2 \cdot n + 3) \cdot \lambda_3} \cdot p_{n,3} + \frac{n \cdot (n-1)}{R^2} \cdot \Phi_{n,3} \right) = n \cdot (n+1) \cdot \Gamma_{23,n,m} :$$

=
> sol1 := solve( {eq1, eq2, eq3, eq4, eq5, eq6, eq7, eq8, eq9, eq10, eq11, eq12, eq13, eq14},
      {An,m, Bn,m, Cn,m, A-n-1,m, B-n-1,m, C-n-1,m, En,m, Fn,m, Gn,m, E-n-1,m, F-n-1,m,
      G-n-1,m, Γ12,n,m, Γ23,n,m} ) :
=
> An,m := simplify(rhs(sol1[1])) :
=
> A-n-1,m := simplify(rhs(sol1[2])) :
=
> Bn,m := simplify(rhs(sol1[3])) :
=
> B-n-1,m := simplify(rhs(sol1[4])) :
=
> Cn,m := simplify(rhs(sol1[5])) :
=
> C-n-1,m := simplify(rhs(sol1[6])) :
=
> En,m := simplify(rhs(sol1[7])) :
=
> E-n-1,m := simplify(rhs(sol1[8])) :
=
> Fn,m := simplify(rhs(sol1[9])) :
=
> F-n-1,m := simplify(rhs(sol1[10])) :
=
> Gn,m := simplify(rhs(sol1[11])) :
=
> G-n-1,m := simplify(rhs(sol1[12])) :
=
> Γ12,n,m := simplify(rhs(sol1[13])) :

```



```

>  $\Gamma 23_{n,m} := \text{simplify}(\text{rhs}(\text{sol1}[14])) :$ 
=
>  $A_{-2,0} := \text{simplify}(\text{subs}(f_{1,0}=1, f_{1,1}=0, n=1, m=0, A_{-n-1,m})) :$ 
=
>  $A_{-2,1} := \text{simplify}(\text{subs}(f_{1,0}=0, f_{1,1}=1, n=1, m=1, A_{-n-1,m})) :$ 
=
>  $Ac_{-2,1} := \text{simplify}(\text{subs}(f_{1,0}=0, f_{1,1}=1, U2_{dx}=U2_{dy}, U3_{dx}=U3_{dy}, \zeta b_{n,m}=\zeta bc_{n,m}, \eta b_{n,m}$ 
 $=\eta bc_{n,n}, \psi b_{n,m}=\psi bc_{n,m}, \zeta b_{-n-1,m}=\zeta bc_{-n-1,m}, \eta b_{-n-1,m}=\eta bc_{-n-1,n}, \psi b_{-n-1,m}$ 
 $=\psi bc_{-n-1,m}, A_{-2,1})) :$ 
=
>  $\eta b_{1,0} := \eta t_{1,0} - U2_{dz} :$ 
=
>  $\eta b_{1,1} := \eta t_{1,1} - U2_{dx} :$ 
=
>  $\eta bc_{1,1} := \eta ct_{1,1} - U2_{dy} :$ 
=
>  $rel1 := A_{-2,0}=0 :$ 
=
>  $rel2 := A_{-2,1}=0 :$ 
=
>  $rel3 := Ac_{-2,1}=0 :$ 
=
>  $E_{-2,0} := \text{simplify}(\text{subs}(f_{1,0}=1, f_{1,1}=0, n=1, m=0, E_{-n-1,m})) :$ 
=
>  $E_{-2,1} := \text{simplify}(\text{subs}(f_{1,0}=0, f_{1,1}=1, n=1, m=1, E_{-n-1,m})) :$ 
=
>  $Ec_{-2,1} := \text{simplify}(\text{subs}(f_{1,0}=0, f_{1,1}=1, U2_{dx}=U2_{dy}, U3_{dx}=U3_{dy}, \zeta b_{n,m}=\zeta bc_{n,m}, \eta b_{n,m}$ 
 $=\eta bc_{n,n}, \psi b_{n,m}=\psi bc_{n,m}, \zeta b_{-n-1,m}=\zeta bc_{-n-1,m}, \eta b_{-n-1,m}=\eta bc_{-n-1,n}, \psi b_{-n-1,m}$ 
 $=\psi bc_{-n-1,m}, E_{-2,1})) :$ 
=
>  $rel4 := E_{-2,0}=0 :$ 
=
>  $rel5 := E_{-2,1}=0 :$ 
=
>  $rel6 := Ec_{-2,1}=0 :$ 
=
>  $sol2 := \text{solve}(\{rel1, rel2, rel3, rel4, rel5, rel6\}, \{U2_{dx}, U2_{dy}, U2_{dz}, U3_{dx}, U3_{dy}, U3_{dz}\}) :$ 
=
> #Droplet velocity
=
>  $U2_{dx} := \text{rhs}(\text{sol2}[1]) :$ 
=
>  $U2_{dy} := \text{rhs}(\text{sol2}[2]) :$ 
=
>  $U2_{dz} := \text{rhs}(\text{sol2}[3]) :$ 
=
>  $U3_{dx} := \text{rhs}(\text{sol2}[4]) :$ 
=
>  $U3_{dy} := \text{rhs}(\text{sol2}[5]) :$ 
=
>  $U3_{dz} := \text{rhs}(\text{sol2}[6]) :$ 
=
> # Uniaxial Extensional Flow
=
>  $\eta b_{2,0} := 1 : \zeta b_{2,0} := 0 : \psi b_{2,0} := 0 : \eta b_{-3,0} := 0 : \zeta b_{-3,0} := 0 : \psi b_{-3,0} := 0 :$ 
=
>  $U2_{dx} := \text{subs}(\zeta b_{-2,1}=0, \zeta b_{1,1}=0, \eta t_{1,1}=0, U2_{dx}) :$ 
=
>  $U2_{dy} := \text{subs}(\zeta b_{-2,1}=0, \zeta b_{1,1}=0, \eta t_{1,1}=0, U2_{dy}) :$ 
=
>  $U2_{dz} := \text{subs}(\zeta b_{-2,0}=0, \zeta b_{1,0}=0, \zeta b_{-2,1}=0, \zeta b_{1,1}=0, \eta t_{1,0}=0, U2_{dz}) :$ 
=
>  $U3_{dx} := \text{subs}(\eta t_{1,1}=0, \zeta b_{-2,0}=0, \zeta b_{1,0}=0, \zeta b_{-2,1}=0, \zeta b_{1,1}=0, \eta t_{1,0}=0, U3_{dx}) :$ 

```

```

> U3dy := subs(ηt1,1 = 0, ζb-2,0 = 0, ζb1,0 = 0, ζb-2,1 = 0, ζb1,1 = 0, ηt1,0 = 0, U3dy) :
> U3dz := subs(ηt1,1 = 0, ζb-2,0 = 0, ζb1,0 = 0, ζb-2,1 = 0, ζb1,1 = 0, ηt1,0 = 0, U3dz) :
> # Drop shape calculation
> A-3,0 := (subs(f1,0 = 0, f1,1 = 0, n = 2, m = 0, A-n-1,m)) :
> A2,0 := (subs(f1,0 = 0, f1,1 = 0, n = 2, m = 0, An,m)) :
> E-3,0 := simplify((subs(f1,0 = 0, f1,1 = 0, n = 2, m = 0, E-n-1,m))) :
> E2,0 := (subs(f1,0 = 0, f1,1 = 0, n = 2, m = 0, En,m)) :
> B2,0 := (subs(f1,0 = 0, f1,1 = 0, n = 2, m = 0, Bn,m)) :
> B-3,0 := (subs(f1,0 = 0, f1,1 = 0, n = 2, m = 0, B-n-1,m)) :
> F-3,0 := (subs(f1,0 = 0, f1,1 = 0, n = 2, m = 0, F-n-1,m)) :
> F2,0 := (subs(f1,0 = 0, f1,1 = 0, n = 2, m = 0, Fn,m)) :
> Γ122,0 := (subs(f1,0 = 0, f1,1 = 0, n = 2, m = 0, Γ12n,m)) :
> Γ232,0 := (subs(f1,0 = 0, f1,1 = 0, n = 2, m = 0, Γ23n,m)) :
>
> f12,2,0 := (-6 λ2 F-3,0 + 3/4 λ2 E-3,0 - λ2 F2,0 + 1/28 λ2 E2,0 + 1/2 ω2 Γ122,0 - 1/4 ζb2,0
- 2 η b-3,0 + 6 B-3,0 + 1/2 η b2,0 - 3/4 A-3,0 - 3/2 ζb-3,0) :
> f23,2,0 := (-1/84 1/R ω1 (-42 α ω2 Γ232,0 R + 63 λ2 E-3,0/R + 3 λ2 E2,0 R4 - 3 λ3 A2,0 R4
- 84 λ2 F2,0 R2 + 84 λ3 B2,0 R2 - 504 λ2 F-3,0/R3)) :
>
> # S1.2. Representative example : Poiseuille flow
> restart :
> p-n-1,1 := A-n-1,m :
> Φ-n-1,1 := B-n-1,m :
> χ-n-1,1 := C-n-1,m :
> pn,inf := 2·(2·n+3)/n · ζbn,m :
> Φn,inf := 1/n · η bn,m :
> χn,inf := 1/(n·(n+1)) · ψ bn,m :
> p-n-1,inf := 2·(2·n-1)/(n+1) · ζb-n-1,m :
> Φ-n-1,inf := -1/(n+1) · η b-n-1,m :

```

$$> \chi_{-n-1, inf} := \frac{1}{n \cdot (n+1)} \cdot \psi b_{-n-1, m} :$$

$$> p_{n, 2} := \lambda_2 \cdot E_{n, m} :$$

$$> \Phi_{n, 2} := F_{n, m} :$$

$$> \chi_{n, 2} := G_{n, m} :$$

$$> p_{-n-1, 2} := \lambda_2 \cdot E_{-n-1, m} :$$

$$> \Phi_{-n-1, 2} := F_{-n-1, m} :$$

$$> \chi_{-n-1, 2} := G_{-n-1, m} :$$

> # equations 1 - 7 at the inner interface  $r=1$

$$> eq1 := \frac{n}{2 \cdot (2 \cdot n + 3)} \cdot p_{n, inf} + n \cdot \Phi_{n, inf} + \frac{(n+1)}{2 \cdot (2 \cdot n - 1)} \cdot p_{-n-1, inf} - (n+1) \cdot \Phi_{-n-1, inf} \\ + \frac{(n+1)}{2 \cdot (2 \cdot n - 1)} \cdot p_{-n-1, 1} - (n+1) \cdot \Phi_{-n-1, 1} = 0 :$$

$$> eq2 := \frac{n}{2 \cdot (2 \cdot n + 3) \cdot \lambda_2} \cdot p_{n, 2} + n \cdot \Phi_{n, 2} + \frac{(n+1)}{2 \cdot (2 \cdot n - 1) \cdot \lambda_2} \cdot p_{-n-1, 2} - (n+1) \cdot \Phi_{-n-1, 2} \\ = 0 :$$

$$> eq3 := - \left( \frac{n \cdot (n+1)}{2 \cdot (2 \cdot n - 1)} \right) \cdot p_{-n-1, 1} + (n+1) \cdot (n+2) \cdot \Phi_{-n-1, 1} + \frac{n \cdot (n+1)}{2 \cdot (2 \cdot n + 3)} \cdot p_{n, inf} + n \\ \cdot (n-1) \cdot \Phi_{n, inf} - \left( \frac{n \cdot (n+1)}{2 \cdot (2 \cdot n - 1)} \right) \cdot p_{-n-1, inf} + (n+1) \cdot (n+2) \cdot \Phi_{-n-1, inf} \\ = \frac{n \cdot (n+1)}{2 \cdot (2 \cdot n + 3) \cdot \lambda_2} \cdot p_{n, 2} + n \cdot (n-1) \cdot \Phi_{n, 2} - \left( \frac{n \cdot (n+1)}{2 \cdot (2 \cdot n - 1) \cdot \lambda_2} \right) \cdot p_{-n-1, 2} + (n+1) \\ \cdot (n+2) \cdot \Phi_{-n-1, 2} :$$

$$> eq4 := n \cdot (n+1) \cdot \chi_{-n-1, 1} + n \cdot (n+1) \cdot \chi_{n, inf} + n \cdot (n+1) \cdot \chi_{-n-1, inf} = n \cdot (n+1) \cdot \chi_{n, 2} + n \\ \cdot (n+1) \cdot \chi_{-n-1, 2} :$$

$$> eq5 := - \frac{(n+1)^2 \cdot (n-1)}{2 \cdot n - 1} \cdot p_{-n-1, 1} + 2 \cdot n \cdot (n+1) \cdot (n+2) \cdot \Phi_{-n-1, 1} \\ - \frac{(n+1)^2 \cdot (n-1)}{2 \cdot n - 1} \cdot p_{-n-1, inf} + 2 \cdot n \cdot (n+1) \cdot (n+2) \cdot \Phi_{-n-1, inf} - \frac{n^2 \cdot (n+2)}{2 \cdot n + 3} \cdot p_{n, inf} \\ - 2 \cdot (n-1) \cdot n \cdot (n+1) \cdot \Phi_{n, inf} + \frac{(n+1)^2 \cdot (n-1)}{(2 \cdot n - 1)} \cdot p_{-n-1, 2} - 2 \cdot n \cdot (n+1) \cdot (n+2) \cdot \lambda_2 \\ \cdot \Phi_{-n-1, 2} + \frac{n^2 \cdot (n+2)}{(2 \cdot n + 3)} \cdot p_{n, 2} + 2 \cdot (n-1) \cdot n \cdot (n+1) \cdot \lambda_2 \cdot \Phi_{n, 2} = -\omega_2 \cdot n \cdot (n+1) \\ \cdot \Gamma_{12, n, m} :$$

$$> eq6 := (n-1) \cdot n \cdot (n+1) \cdot \chi_{n, inf} - n \cdot (n+1) \cdot (n+2) \cdot \chi_{-n-1, inf} - n \cdot (n+1) \cdot (n+2) \\ \cdot \chi_{-n-1, 1} - (n-1) \cdot n \cdot (n+1) \cdot \lambda_2 \cdot \chi_{n, 2} + n \cdot (n+1) \cdot (n+2) \cdot \lambda_2 \cdot \chi_{-n-1, 2} = 0 :$$

$$> eq7 := \frac{n \cdot (n+1)}{2 \cdot (2 \cdot n + 3) \cdot \lambda_2} \cdot p_{n, 2} + n \cdot (n-1) \cdot \Phi_{n, 2} - \frac{n \cdot (n+1)}{2 \cdot (2 \cdot n - 1) \cdot \lambda_2} \cdot p_{-n-1, 2} + (n+1) \cdot (n \\ + 2) \cdot \Phi_{-n-1, 2} = n \cdot (n+1) \cdot \Gamma_{12, n, m} :$$

```

> # equations 8 - 14 at the outer interface r=R
> # redefining solid harmonics at r=R
>  $p_{n,3} := \lambda_3 \cdot A_{n,m} \cdot R^n :$ 
=
>  $\Phi_{n,3} := B_{n,m} \cdot R^n :$ 
=
>  $\chi_{n,3} := C_{n,m} \cdot R^n :$ 
=
>  $p_{n,2} := \lambda_2 \cdot E_{n,m} \cdot R^n :$ 
=
>  $\Phi_{n,2} := F_{n,m} \cdot R^n :$ 
=
>  $\chi_{n,2} := G_{n,m} \cdot R^n :$ 
=
>  $p_{-n-1,2} := \lambda_2 \cdot E_{-n-1,m} \cdot R^{-n-1} :$ 
=
>  $\Phi_{-n-1,2} := F_{-n-1,m} \cdot R^{-n-1} :$ 
=
>  $\chi_{-n-1,2} := G_{-n-1,m} \cdot R^{-n-1} :$ 
=
>  $eq8 := \frac{n \cdot R}{2 \cdot (2 \cdot n + 3) \cdot \lambda_2} \cdot p_{n,2} + \frac{n}{R} \cdot \Phi_{n,2} + \frac{(n+1) \cdot R}{2 \cdot (2 \cdot n - 1) \cdot \lambda_2} \cdot p_{-n-1,2} - \frac{(n+1)}{R} \cdot \Phi_{-n-1,2}$ 
=
<math display="block">= (U3_{dz} - U2_{dz}) \cdot f_{1,0} + (U3_{dx} - U2_{dx}) \cdot f_{1,1} :
=
>  $eq9 := \frac{n \cdot R}{2 \cdot (2 \cdot n + 3) \cdot \lambda_3} \cdot p_{n,3} + \frac{n}{R} \cdot \Phi_{n,3} = (U3_{dz} - U2_{dz}) \cdot f_{1,0} + (U3_{dx} - U2_{dx}) \cdot f_{1,1} :$ 
=
>  $eq10 := \frac{n \cdot (n+1) \cdot R}{2 \cdot (2 \cdot n + 3) \cdot \lambda_2} \cdot p_{n,2} + \frac{n \cdot (n-1)}{R} \cdot \Phi_{n,2} - \left( \frac{n \cdot (n+1) \cdot R}{2 \cdot (2 \cdot n - 1) \cdot \lambda_2} \right) \cdot p_{-n-1,2}$ 
<math display="block">+ \frac{(n+1) \cdot (n+2)}{R} \cdot \Phi_{-n-1,2} - \frac{n \cdot (n+1) \cdot R}{2 \cdot (2 \cdot n + 3) \cdot \lambda_3} \cdot p_{n,3} - \frac{n \cdot (n-1)}{R} \cdot \Phi_{n,3} = 0 :
=
>  $eq11 := n \cdot (n+1) \cdot (\chi_{n,2} + \chi_{-n-1,2}) - n \cdot (n+1) \cdot \chi_{n,3} = 0 :$ 
=
>  $eq12 := - \frac{(n+1)^2 \cdot (n-1) \cdot R}{(2 \cdot n - 1)} \cdot p_{-n-1,2} + 2 \cdot n \cdot (n+1) \cdot \frac{(n+2)}{R} \cdot \lambda_2 \cdot \Phi_{-n-1,2}$ 
<math display="block">- \frac{n^2 \cdot (n+2) \cdot R}{(2 \cdot n + 3)} \cdot p_{n,2} - \frac{2 \cdot (n-1) \cdot n \cdot (n+1)}{R} \cdot \lambda_2 \cdot \Phi_{n,2} + \frac{n^2 \cdot (n+2) \cdot R}{(2 \cdot n + 3)} \cdot p_{n,3}
<math display="block">+ \frac{2 \cdot (n-1) \cdot n \cdot (n+1)}{R} \cdot \lambda_3 \cdot \Phi_{n,3} = -\alpha \cdot \delta_2 \cdot n \cdot (n+1) \cdot \Gamma_{23,n,m} :
=
>  $eq13 := \lambda_2 \cdot n \cdot (n+1) \cdot (n-1) \cdot \chi_{n,2} - \lambda_2 \cdot n \cdot (n+1) \cdot (n+2) \cdot \chi_{-n-1,2} - \lambda_3 \cdot n \cdot (n+1) \cdot (n-1) \cdot \chi_{n,3} = 0 :$ 
=
>  $eq14 := \frac{1}{d} \cdot \left( \frac{n \cdot (n+1)}{2 \cdot (2 \cdot n + 3) \cdot \lambda_3} \cdot p_{n,3} + \frac{n \cdot (n-1)}{R^2} \cdot \Phi_{n,3} \right) = n \cdot (n+1) \cdot \Gamma_{23,n,m} :$ 
=
>  $soll := solve(\{eq1, eq2, eq3, eq4, eq5, eq6, eq7, eq8, eq9, eq10, eq11, eq12, eq13, eq14\},$ 
<math display="block">\{A_{n,m}, B_{n,m}, C_{n,m}, A_{-n-1,m}, B_{-n-1,m}, C_{-n-1,m}, E_{n,m}, F_{n,m}, G_{n,m}, E_{-n-1,m}, F_{-n-1,m},
<math display="block">G_{-n-1,m}, \Gamma_{12,n,m}, \Gamma_{23,n,m}\}) :
=
>  $A_{n,m} := simplify(rhs(soll[1])) :$ 

```

```

>  $A_{-n-1,m} := \text{simplify}(\text{rhs}(\text{sol1}[2])) :$ 
=
>  $B_{n,m} := \text{simplify}(\text{rhs}(\text{sol1}[3])) :$ 
=
>  $B_{-n-1,m} := \text{simplify}(\text{rhs}(\text{sol1}[4])) :$ 
=
>  $C_{n,m} := \text{simplify}(\text{rhs}(\text{sol1}[5])) :$ 
=
>  $C_{-n-1,m} := \text{simplify}(\text{rhs}(\text{sol1}[6])) :$ 
=
>  $E_{n,m} := \text{simplify}(\text{rhs}(\text{sol1}[7])) :$ 
=
>  $E_{-n-1,m} := \text{simplify}(\text{rhs}(\text{sol1}[8])) :$ 
=
>  $F_{n,m} := \text{simplify}(\text{rhs}(\text{sol1}[9])) :$ 
=
>  $F_{-n-1,m} := \text{simplify}(\text{rhs}(\text{sol1}[10])) :$ 
=
>  $G_{n,m} := \text{simplify}(\text{rhs}(\text{sol1}[11])) :$ 
=
>  $G_{-n-1,m} := \text{simplify}(\text{rhs}(\text{sol1}[12])) :$ 
=
>  $\Gamma 12_{n,m} := \text{simplify}(\text{rhs}(\text{sol1}[13])) :$ 
=
>  $\Gamma 23_{n,m} := \text{simplify}(\text{rhs}(\text{sol1}[14])) :$ 
=
>  $A_{-2,0} := \text{simplify}(\text{subs}(f_{1,0}=1, f_{1,1}=0, n=1, m=0, A_{-n-1,m})) :$ 
>  $A_{-2,1} := \text{simplify}(\text{subs}(f_{1,0}=0, f_{1,1}=1, n=1, m=1, A_{-n-1,m})) :$ 
=
>  $Ac_{-2,1} := \text{simplify}(\text{subs}(f_{1,0}=0, f_{1,1}=1, U2_{dx}=U2_{dy}, U3_{dx}=U3_{dy}, \zeta b_{n,m}=\zeta b_{n,m}, \eta b_{n,m}$ 
 $=\eta b_{n,n}, \psi b_{n,m}=\psi b_{n,m}, \zeta b_{-n-1,m}=\zeta b_{-n-1,m}, \eta b_{-n-1,m}=\eta b_{-n-1,n}, \psi b_{-n-1,m}$ 
 $=\psi b_{-n-1,m}, A_{-2,1})) :$ 
=
>  $\eta b_{1,0} := \eta t_{1,0} - U2_{dz} :$ 
>  $\eta b_{1,1} := \eta t_{1,1} - U2_{dx} :$ 
>  $\eta b_{c_{1,1}} := \eta ct_{1,1} - U2_{dy} :$ 
=
>  $rel1 := A_{-2,0}=0 :$ 
>  $rel2 := A_{-2,1}=0 :$ 
>  $rel3 := Ac_{-2,1}=0 :$ 
=
>  $E_{-2,0} := \text{simplify}(\text{subs}(f_{1,0}=1, f_{1,1}=0, n=1, m=0, E_{-n-1,m})) :$ 
>  $E_{-2,1} := \text{simplify}(\text{subs}(f_{1,0}=0, f_{1,1}=1, n=1, m=1, E_{-n-1,m})) :$ 
=
>  $Ec_{-2,1} := \text{simplify}(\text{subs}(f_{1,0}=0, f_{1,1}=1, U2_{dx}=U2_{dy}, U3_{dx}=U3_{dy}, \zeta b_{n,m}=\zeta b_{n,m}, \eta b_{n,m}$ 
 $=\eta b_{n,n}, \psi b_{n,m}=\psi b_{n,m}, \zeta b_{-n-1,m}=\zeta b_{-n-1,m}, \eta b_{-n-1,m}=\eta b_{-n-1,n}, \psi b_{-n-1,m}$ 
 $=\psi b_{-n-1,m}, E_{-2,1})) :$ 
=
>  $rel4 := E_{-2,0}=0 :$ 
>  $rel5 := E_{-2,1}=0 :$ 
>  $rel6 := Ec_{-2,1}=0 :$ 
=
>  $sol2 := \text{solve}(\{rel1, rel2, rel3, rel4, rel5, rel6\}, \{U2_{dx}, U2_{dy}, U2_{dz}, U3_{dx}, U3_{dy}, U3_{dz}\}) :$ 
=
> #Droplet velocity

```

```

> U2dx := rhs(sol2[1]) :
> U2dy := rhs(sol2[2]) :
> U2dz := rhs(sol2[3]) :
> U3dx := rhs(sol2[4]) :
> U3dy := rhs(sol2[5]) :
> U3dz := rhs(sol2[6]) :
> # special flow: Poiseuille flow
> ζ1,0 := - $\frac{2}{5} \cdot \frac{1}{R0^2}$  : η1,0 := 1 -  $\left(\frac{b}{R0}\right)^2$  : ηb,1 := - $\frac{2}{3} \cdot \frac{b}{(R0)^2}$  : ηb,0 :=  $\frac{2}{5 \cdot (R0)^2}$  :
> η1,1 := 0 : ηtc,1 := 0 : ζ1,1 := 0 : ζ-2,1 := 0 : ζ-2,0 := 0 : ζb,0 := 0 : ηb,0 := 0 : ζb,1
:= 0 : ηb,-4,0 := 0 : ζ3,0 := 0 :
> U2dx := simplify(U2dx) :
> U2dy := simplify(U2dy) :
> U2dz := simplify(U2dz) :
> U3dx := simplify(U3dx) :
> U3dy := simplify(U3dy) :
> U3dz := simplify(subs(U3dz)) :
>
> # Calculation of drop shape
> A-4,0 := (subs(f1,0=0, f1,1=0, n=3, m=0, A-n-1,m)) :
> A-3,1 := (subs(f1,0=0, f1,1=0, n=2, m=1, A-n-1,m)) :
> A3,0 := (subs(f1,0=0, f1,1=0, n=3, m=0, An,m)) :
> A2,1 := (subs(f1,0=0, f1,1=0, n=2, m=1, An,m)) :
> E-4,0 := simplify(subs(f1,0=0, f1,1=0, n=3, m=0, E-n-1,m)) :
> E-3,1 := simplify(subs(f1,0=0, f1,1=0, n=2, m=1, E-n-1,m)) :
> E3,0 := (subs(f1,0=0, f1,1=0, n=3, m=0, En,m)) :
> E2,1 := (subs(f1,0=0, f1,1=0, n=2, m=1, En,m)) :
> B3,0 := (subs(f1,0=0, f1,1=0, n=3, m=0, Bn,m)) :
> B2,1 := (subs(f1,0=0, f1,1=0, n=2, m=1, Bn,m)) :
> B-4,0 := (subs(f1,0=0, f1,1=0, n=3, m=0, B-n-1,m)) :
> B-3,1 := (subs(f1,0=0, f1,1=0, n=2, m=1, B-n-1,m)) :
> F-4,0 := (subs(f1,0=0, f1,1=0, n=3, m=0, F-n-1,m)) :
> F-3,1 := (subs(f1,0=0, f1,1=0, n=2, m=1, F-n-1,m)) :
> F3,0 := (subs(f1,0=0, f1,1=0, n=3, m=0, Fn,m)) :
> F2,1 := (subs(f1,0=0, f1,1=0, n=2, m=1, Fn,m)) :
> Γ123,0 := (subs(f1,0=0, f1,1=0, n=3, m=0, Γ12n,m)) :

```

```

>  $\Gamma 12_{2,1} := \left( \text{subs}(f_{1,0}=0, f_{1,1}=0, n=2, m=1, \Gamma 12_{n,m}) \right) :$ 
=
>  $\Gamma 23_{3,0} := \left( \text{subs}(f_{1,0}=0, f_{1,1}=0, n=3, m=0, \Gamma 23_{n,m}) \right) :$ 
=
>  $\Gamma 23_{2,1} := \left( \text{subs}(f_{1,0}=0, f_{1,1}=0, n=2, m=1, \Gamma 23_{n,m}) \right) :$ 
=
>
=
>  $f_{23,3,0} := \left( -\frac{1}{450} \frac{1}{R \omega_1} \left( -90 \alpha \omega_2 \Gamma 23_{3,0} R + \frac{153 \lambda_2 E_{-4,0}}{R^2} - 15 \lambda_2 E_{3,0} R^5 + 15 \lambda_3 A_{3,0} R^5 \right. \right.$ 
 $\left. \left. - \frac{1800 \lambda_2 F_{-4,0}}{R^4} - 540 \lambda_2 F_{3,0} R^3 + 540 \lambda_3 B_{3,0} R^3 \right) \right) :$ 
=
>  $f_{23,2,1} := \left( -\frac{1}{84} \frac{1}{R \omega_1} \left( -42 \alpha \omega_2 \Gamma 23_{2,1} R + \frac{63 \lambda_2 E_{-3,1}}{R} + 3 \lambda_2 E_{2,1} R^4 - 3 \lambda_3 A_{2,1} R^4 \right. \right.$ 
 $\left. \left. - 84 \lambda_2 F_{2,1} R^2 - \frac{504 \lambda_2 F_{-3,1}}{R^3} + 84 \lambda_3 B_{2,1} R^2 \right) \right) :$ 
=
>  $f_{12,3,0} := \left( \frac{1}{5} \omega_2 \Gamma 12_{3,0} + \frac{17}{50} \lambda_2 E_{-4,0} - \frac{1}{30} \lambda_2 E_{3,0} - 4 \lambda_2 F_{-4,0} - \frac{6}{5} \lambda_2 F_{3,0} + \frac{1}{5} \zeta_{3,0} \right.$ 
 $\left. - \eta b_{-4,0} + 4 B_{-4,0} + \frac{2}{5} \eta b_{3,0} - \frac{17}{50} A_{-4,0} - \frac{17}{20} \zeta_{-4,0} \right) :$ 
=
>  $f_{12,2,1} := \left( \frac{1}{2} \omega_2 \Gamma 12_{2,1} + \frac{3}{4} \lambda_2 E_{-3,1} + \frac{1}{28} \lambda_2 E_{2,1} - 6 \lambda_2 F_{-3,1} - \lambda_2 F_{2,1} - \frac{1}{4} \zeta_{2,1} \right.$ 
 $\left. - 2 \eta b_{-3,1} + 6 B_{-3,1} + \frac{1}{2} \eta b_{2,1} - \frac{3}{4} A_{-3,1} - \frac{3}{2} \zeta_{-3,1} \right) :$ 
=
>  $f_{23,3,0} := \text{simplify}(f_{23,3,0}) :$ 
=
>  $f_{23,2,1} := \text{simplify}(f_{23,2,1}) :$ 
=
>  $f_{12,3,0} := \text{simplify}(f_{12,3,0}) :$ 
=
>  $f_{12,2,1} := \text{simplify}(f_{12,2,1}) :$ 
=
>
=
> # S1.3. Calculation of effective viscosity for linear flow
=
> restart : with(VectorCalculus) : SetCoordinates('spherical', r, theta, phi) :
=
>  $e_x := \text{VectorField}(\langle \sin(\text{theta}) \cdot \cos(\text{phi}), \cos(\text{theta}) \cdot \cos(\text{phi}), (-\sin(\text{phi})) \rangle) :$ 
=
>  $e_y := \text{VectorField}(\langle \sin(\text{theta}) \cdot \sin(\text{phi}), \cos(\text{theta}) \cdot \sin(\text{phi}), \cos(\text{phi}) \rangle) :$ 
=
>  $e_z := \text{VectorField}(\langle \cos(\text{theta}), (-\sin(\text{theta})), 0 \rangle) :$ 
=
>  $P_{2,0} := \frac{1}{2} \cdot (3 \cdot (\cos(\text{theta}))^2 - 1) :$ 
=
>
=
>  $A_{-3,0} := \left( - \left( -1500 R^5 d \lambda_2^2 - 750 \lambda_3 R^4 d \lambda_2 + 750 \lambda_3 R^5 d \omega_2 - 300 \alpha \omega_2 \lambda_2 R^2 \right. \right.$ 
 $\left. - 100 R \omega_2 \lambda_2 d - 100 \lambda_3 R d \omega_2 + 150 R^5 \alpha \omega_2 \lambda_2 + 225 R^6 \lambda_3 d \omega_2 - 300 \lambda_3 d \omega_2 R^3 \right.$ 
 $\left. - 300 \lambda_2 d \omega_2 R^3 + 150 R^6 d \omega_2 \lambda_2 + 200 \alpha \omega_2 R^7 \lambda_2 + 200 \lambda_2 R^8 d \omega_2 - 200 \lambda_3 R^8 d \omega_2 \right)$ 

```

$$\begin{aligned}
& + 300 R^7 d \omega_2 \lambda_2 + 300 \alpha \omega_2 R^6 \lambda_2 - 300 \lambda_3 R^7 d \omega_2 - 150 \alpha \omega_2 R^3 \lambda_2 + 225 \lambda_3 R^4 d \omega_2 \\
& - 200 \alpha \omega_2 \lambda_2 R - 200 R^2 \omega_2 \lambda_2 d + 750 R^6 \lambda_3 d \lambda_2 + 1000 \lambda_3 R^8 d \lambda_2 + 1500 \lambda_3 R^7 d \lambda_2 \\
& - 1000 \lambda_3 R^2 d \lambda_2 + 500 \lambda_3 R^9 d \lambda_2 - 1500 R^6 \lambda_2^2 d - 120 \alpha \omega_2 R^6 + 150 \alpha \omega_2^2 R^4 \\
& + 450 R^6 \lambda_3 d - 60 \alpha \omega_2^2 R^6 + 300 R^6 \lambda_2 d + 300 \alpha \omega_2 R^4 - 60 \alpha \omega_2^2 R^2 - 100 \alpha \omega_2 \lambda_2 \\
& + 400 \lambda_2 R^8 d - 200 R \lambda_2 d - 500 \lambda_3 R d \lambda_2 - 400 \lambda_3 R^8 d - 600 \lambda_3 d R^3 - 600 \lambda_3 R^7 d \\
& - 1000 \lambda_2^2 R^8 d - 1500 R^7 \lambda_2^2 d - 200 \lambda_3 R d + 600 R^7 \lambda_2 d - 1000 R^2 \lambda_2^2 d - 400 R^2 \lambda_2 d \\
& + 450 \lambda_3 R^4 d - 1500 \lambda_2^2 d R^3 - 300 R^4 \lambda_2 d - 1500 R^4 \lambda_2^2 d - 600 \lambda_2 d R^3 - 500 R \lambda_2^2 d \\
& + 1500 \lambda_3 R^5 d - 200 \lambda_3 R^9 d + 200 R^9 \lambda_2 d - 500 R^9 \lambda_2^2 d - 400 \lambda_3 R^2 d - 1500 \lambda_3 d \lambda_2 R^3 \\
& - 40 \alpha \omega_2^2 R^7 + 100 \alpha \omega_2 R^8 \lambda_2 + 100 R^9 d \omega_2 \lambda_2 - 100 \lambda_3 R^9 d \omega_2 - 150 R^4 \lambda_2 d \omega_2 \\
& - 200 \lambda_3 R^2 d \omega_2 - 40 \alpha \omega_2 - 20 \alpha \omega_2^2 - 40 \alpha \omega_2^2 R - 80 \alpha \omega_2 R - 40 \alpha \omega_2 R^8 - 20 \alpha \\
& \omega_2^2 R^8 + 45 \alpha \omega_2^2 R^3 - 80 \alpha \omega_2 R^7 - 120 \alpha \omega_2 R^2 + 90 R^5 \alpha \omega_2 + 90 \alpha \omega_2 R^3 + 45 \alpha \omega_2^2 R^5) \\
& \Big/ \Big( -300 R^5 d \lambda_2^2 - 150 \lambda_3 R^4 d \lambda_2 + 150 \lambda_3 R^5 d \omega_2 - 60 \alpha \omega_2 \lambda_2 R^2 - 20 R \omega_2 \lambda_2 d \\
& - 20 \lambda_3 R d \omega_2 + 30 R^5 \alpha \omega_2 \lambda_2 + 45 R^6 \lambda_3 d \omega_2 - 60 \lambda_3 d \omega_2 R^3 - 60 \lambda_2 d \omega_2 R^3 \\
& + 30 R^6 d \omega_2 \lambda_2 + 40 \alpha \omega_2 R^7 \lambda_2 + 40 \lambda_2 R^8 d \omega_2 - 40 \lambda_3 R^8 d \omega_2 + 60 R^7 d \omega_2 \lambda_2 \\
& + 60 \alpha \omega_2 R^6 \lambda_2 - 60 \lambda_3 R^7 d \omega_2 - 30 \alpha \omega_2 R^3 \lambda_2 + 45 \lambda_3 R^4 d \omega_2 - 40 \alpha \omega_2 \lambda_2 R \\
& - 40 R^2 \omega_2 \lambda_2 d + 150 R^6 \lambda_3 d \lambda_2 + 200 \lambda_3 R^8 d \lambda_2 + 300 \lambda_3 R^7 d \lambda_2 - 200 \lambda_3 R^2 d \lambda_2 \\
& + 100 \lambda_3 R^9 d \lambda_2 - 300 R^6 \lambda_2^2 d - 60 \alpha \omega_2 R^6 + 30 \alpha \omega_2^2 R^4 + 225 R^6 \lambda_3 d - 12 \alpha \omega_2^2 R^6 \\
& + 150 R^6 \lambda_2 d + 150 \alpha \omega_2 R^4 - 12 \alpha \omega_2^2 R^2 - 20 \alpha \omega_2 \lambda_2 + 200 \lambda_2 R^8 d - 100 R \lambda_2 d \\
& - 100 \lambda_3 R d \lambda_2 - 200 \lambda_3 R^8 d - 300 \lambda_3 d R^3 - 300 \lambda_3 R^7 d - 200 \lambda_2^2 R^8 d - 300 R^7 \lambda_2^2 d \\
& - 100 \lambda_3 R d + 300 R^7 \lambda_2 d - 200 R^2 \lambda_2^2 d - 200 R^2 \lambda_2 d + 225 \lambda_3 R^4 d - 300 \lambda_2^2 d R^3 \\
& - 150 R^4 \lambda_2 d - 300 R^4 \lambda_2^2 d - 300 \lambda_2 d R^3 - 100 R \lambda_2^2 d + 750 \lambda_3 R^5 d - 100 \lambda_3 R^9 d \\
& + 100 R^9 \lambda_2 d - 100 R^9 \lambda_2^2 d - 200 \lambda_3 R^2 d - 300 \lambda_3 d \lambda_2 R^3 - 8 \alpha \omega_2^2 R^7 + 20 \alpha \omega_2 R^8 \lambda_2 \\
& + 20 R^9 d \omega_2 \lambda_2 - 20 \lambda_3 R^9 d \omega_2 - 30 R^4 \lambda_2 d \omega_2 - 40 \lambda_3 R^2 d \omega_2 - 20 \alpha \omega_2 - 4 \alpha \omega_2^2 \\
& - 8 \alpha \omega_2^2 R - 40 \alpha \omega_2 R - 20 \alpha \omega_2 R^8 - 4 \alpha \omega_2^2 R^8 + 9 \alpha \omega_2^2 R^3 - 40 \alpha \omega_2 R^7 - 60 \alpha \omega_2 R^2 \\
& + 45 R^5 \alpha \omega_2 + 45 \alpha \omega_2 R^3 + 9 \alpha \omega_2^2 R^5) \Big) :
\end{aligned}$$

$$\begin{aligned}
> B_{-3,0} := & \left( -\frac{1}{2} \left( -300 R^5 d \lambda_2^2 - 150 \lambda_3 R^4 d \lambda_2 + 150 \lambda_3 R^5 d \omega_2 - 60 \alpha \omega_2 \lambda_2 R^2 \right. \right. \\
& - 20 R \omega_2 \lambda_2 d - 20 \lambda_3 R d \omega_2 + 30 R^5 \alpha \omega_2 \lambda_2 + 45 R^6 \lambda_3 d \omega_2 - 60 \lambda_3 d \omega_2 R^3 \\
& - 60 \lambda_2 d \omega_2 R^3 + 30 R^6 d \omega_2 \lambda_2 + 40 \alpha \omega_2 R^7 \lambda_2 + 40 \lambda_2 R^8 d \omega_2 - 40 \lambda_3 R^8 d \omega_2 \\
& \left. \left. + 60 R^7 d \omega_2 \lambda_2 + 60 \alpha \omega_2 R^6 \lambda_2 - 60 \lambda_3 R^7 d \omega_2 - 30 \alpha \omega_2 R^3 \lambda_2 + 45 \lambda_3 R^4 d \omega_2 \right. \right.
\end{aligned}$$



$$\begin{aligned}
& -40 \alpha \omega_2 \lambda_2 R - 40 R^2 \omega_2 \lambda_2 d + 150 R^6 \lambda_3 d \lambda_2 + 200 \lambda_3 R^8 d \lambda_2 + 300 \lambda_3 R^7 d \lambda_2 \\
& - 200 \lambda_3 R^2 d \lambda_2 + 100 \lambda_3 R^9 d \lambda_2 - 300 R^6 \lambda_2^2 d + 30 \alpha \omega_2^2 R^4 - 12 \alpha \omega_2^2 R^6 - 12 \alpha \omega_2^2 R^2 \\
& - 20 \alpha \omega_2 \lambda_2 - 100 \lambda_3 R d \lambda_2 - 200 \lambda_2^2 R^8 d - 300 R^7 \lambda_2^2 d - 200 R^2 \lambda_2^2 d - 300 \lambda_2^2 d R^3 \\
& - 300 R^4 \lambda_2^2 d - 100 R \lambda_2^2 d - 100 R^9 \lambda_2^2 d - 300 \lambda_3 d \lambda_2 R^3 - 8 \alpha \omega_2^2 R^7 + 20 \alpha \omega_2 R^8 \lambda_2 \\
& + 20 R^9 d \omega_2 \lambda_2 - 20 \lambda_3 R^9 d \omega_2 - 30 R^4 \lambda_2 d \omega_2 - 40 \lambda_3 R^2 d \omega_2 - 4 \alpha \omega_2^2 - 8 \alpha \omega_2^2 R \\
& - 4 \alpha \omega_2^2 R^8 + 9 \alpha \omega_2^2 R^3 + 9 \alpha \omega_2^2 R^5) \Big/ \Big( -300 R^5 d \lambda_2^2 - 150 \lambda_3 R^4 d \lambda_2 + 150 \lambda_3 R^5 d \omega_2 \\
& - 60 \alpha \omega_2 \lambda_2 R^2 - 20 R \omega_2 \lambda_2 d - 20 \lambda_3 R d \omega_2 + 30 R^5 \alpha \omega_2 \lambda_2 + 45 R^6 \lambda_3 d \omega_2 \\
& - 60 \lambda_3 d \omega_2 R^3 - 60 \lambda_2 d \omega_2 R^3 + 30 R^6 d \omega_2 \lambda_2 + 40 \alpha \omega_2 R^7 \lambda_2 + 40 \lambda_2 R^8 d \omega_2 \\
& - 40 \lambda_3 R^8 d \omega_2 + 60 R^7 d \omega_2 \lambda_2 + 60 \alpha \omega_2 R^6 \lambda_2 - 60 \lambda_3 R^7 d \omega_2 - 30 \alpha \omega_2 R^3 \lambda_2 \\
& + 45 \lambda_3 R^4 d \omega_2 - 40 \alpha \omega_2 \lambda_2 R - 40 R^2 \omega_2 \lambda_2 d + 150 R^6 \lambda_3 d \lambda_2 + 200 \lambda_3 R^8 d \lambda_2 \\
& + 300 \lambda_3 R^7 d \lambda_2 - 200 \lambda_3 R^2 d \lambda_2 + 100 \lambda_3 R^9 d \lambda_2 - 300 R^6 \lambda_2^2 d - 60 \alpha \omega_2 R^6 + 30 \alpha \\
& \omega_2^2 R^4 + 225 R^6 \lambda_3 d - 12 \alpha \omega_2^2 R^6 + 150 R^6 \lambda_2 d + 150 \alpha \omega_2 R^4 - 12 \alpha \omega_2^2 R^2 - 20 \alpha \omega_2 \lambda_2 \\
& + 200 \lambda_2 R^8 d - 100 R \lambda_2 d - 100 \lambda_3 R d \lambda_2 - 200 \lambda_3 R^8 d - 300 \lambda_3 d R^3 - 300 \lambda_3 R^7 d \\
& - 200 \lambda_2^2 R^8 d - 300 R^7 \lambda_2^2 d - 100 \lambda_3 R d + 300 R^7 \lambda_2 d - 200 R^2 \lambda_2^2 d - 200 R^2 \lambda_2 d \\
& + 225 \lambda_3 R^4 d - 300 \lambda_2^2 d R^3 - 150 R^4 \lambda_2 d - 300 R^4 \lambda_2^2 d - 300 \lambda_2 d R^3 - 100 R \lambda_2^2 d \\
& + 750 \lambda_3 R^5 d - 100 \lambda_3 R^9 d + 100 R^9 \lambda_2 d - 100 R^9 \lambda_2^2 d - 200 \lambda_3 R^2 d - 300 \lambda_3 d \lambda_2 R^3 \\
& - 8 \alpha \omega_2^2 R^7 + 20 \alpha \omega_2 R^8 \lambda_2 + 20 R^9 d \omega_2 \lambda_2 - 20 \lambda_3 R^9 d \omega_2 - 30 R^4 \lambda_2 d \omega_2 \\
& - 40 \lambda_3 R^2 d \omega_2 - 20 \alpha \omega_2 - 4 \alpha \omega_2^2 - 8 \alpha \omega_2^2 R - 40 \alpha \omega_2 R - 20 \alpha \omega_2 R^8 - 4 \alpha \omega_2^2 R^8 \\
& + 9 \alpha \omega_2^2 R^3 - 40 \alpha \omega_2 R^7 - 60 \alpha \omega_2 R^2 + 45 R^5 \alpha \omega_2 + 45 \alpha \omega_2 R^3 + 9 \alpha \omega_2^2 R^5) \Big) :
\end{aligned}$$

>

$$p_{-3} := \left( \frac{1}{r^3} \cdot A_{-3,0} \cdot P_{2,0} \right) :$$

>

$$p_e := p_{-3} :$$

>

$$\chi_e := 0 :$$

>

$$\Phi_{-3} := \left( \frac{1}{r^3} \cdot B_{-3,0} \cdot P_{2,0} \right) :$$

>

$$\Phi_e := \Phi_{-3} :$$

>

$$T5 := \text{Curl}(\chi_e \cdot \text{VectorField}(\langle r, 0, 0 \rangle)) :$$

>

$$T6 := \text{Gradient}(\Phi_e) :$$

>

$$\begin{aligned}
fn3 := \text{subs}\left(n = -n - 1, \frac{(n+3)}{2 \cdot (n+1) \cdot (2 \cdot n + 3)}\right) : fn4 := \text{subs}\left(n = -n - 1, \right. \\
\left. - \frac{n}{(n+1) \cdot (2 \cdot n + 3)}\right) :
\end{aligned}$$

```

> T7 := subs(n=2,fn3)·r2·Gradient(p-3) :
=
> T8 := subs(n=2,fn4)·VectorField(⟨r, 0, 0⟩)·(p-3) :
=
>
> Vinf := - 1/2 · r · sin(theta) · cos(phi) · ex - 1/2 · r · sin(theta) · sin(phi) · ey + r · cos(theta) · ez :
=
> ue := Vinf + simplify(T5 + T6 + T7 + T8) :
=
> uex := DotProduct(ue ex) :
> uey := DotProduct(ue ey) :
> uez := DotProduct(ue ez) :
> nx := DotProduct(VectorField(⟨1, 0, 0⟩), ex) :
> ny := DotProduct(VectorField(⟨1, 0, 0⟩), ey) :
> nz := DotProduct(VectorField(⟨1, 0, 0⟩), ez) :
> Exx := 2 · uex · nx ; Eyy := 2 · uey · ny ; Ezz := 2 · uez · nz :
> Exy := uex · ny + uey · nx ; Exz := uex · nz + uez · nx ; Eyz := uey · nz + uez · ny :
> Exz := uex · nz + uez · nx :
> i11 := int(int(subs(r=1, (Exx·r2·sin(theta))), theta=0..Pi), phi=0..2·Pi) :
> i12 := int(int(subs(r=1, (Exy·r2·sin(theta))), theta=0..Pi), phi=0..2·Pi) :
> i13 := int(int(subs(r=1, (Exz·r2·sin(theta))), theta=0..Pi), phi=0..2·Pi) :
> i22 := int(int(subs(r=1, (Eyy·r2·sin(theta))), theta=0..Pi), phi=0..2·Pi) :
> i23 := int(int(subs(r=1, (Eyz·r2·sin(theta))), theta=0..Pi), phi=0..2·Pi) :
> i33 := int(int(subs(r=1, (Ezz·r2·sin(theta))), theta=0..Pi), phi=0..2·Pi) :
> β2,0 := 1 :
> Φ2,inf := 1/2 · r2 · β2,0 · P2,0 :
> τinf := 1/r · 2 · Gradient(Φ2,inf) :
> τe := τinf + 1/r · ( (-8) · Gradient(Φ-3) + (-3/2) · (VectorField(⟨r, 0, 0⟩) · p-3) + (1/2) · (r2 · Gradient(p-3)) ) :
> τex := DotProduct(τe, ex) ; τey := DotProduct(τe, ey) ; τez := DotProduct(τe, ez) :
>
> Fxx := 1/2 · ( 2 · τex · nx - 2/3 · DotProduct(τe, VectorField(⟨1, 0, 0⟩)) ) ; Fyy := 1/2 · ( 2 · τey · ny - 2/3 · DotProduct(τe, VectorField(⟨1, 0, 0⟩)) ) ; Fzz := 1/2 · ( 2 · τez · nz - 2/3

```

```

|      ·DotProduct(τeVectorField(⟨1, 0, 0⟩)) :
|=
| > Fxy := 1/2 · ( τex · ny + τey · nx ) : Fxz := 1/2 · ( τex · nz + τez · nx ) : Fyz := 1/2 · ( τey · nz + τez · ny ) :
|=
| > j11 := int( int( subs( r=1, ( Fxx · r2 · sin(theta) ) ), theta=0..Pi ), phi=0..2·Pi ) :
|=
| > j12 := int( int( subs( r=1, ( Fxy · r2 · sin(theta) ) ), theta=0..Pi ), phi=0..2·Pi ) :
|=
| > j13 := int( int( subs( r=1, ( Fxz · r2 · sin(theta) ) ), theta=0..Pi ), phi=0..2·Pi ) :
|=
| > j23 := int( int( subs( r=1, ( Fyz · r2 · sin(theta) ) ), theta=0..Pi ), phi=0..2·Pi ) :
|=
| > j22 := int( int( subs( r=1, ( Fyy · r2 · sin(theta) ) ), theta=0..Pi ), phi=0..2·Pi ) :
|=
| > j33 := int( int( subs( r=1, ( Fzz · r2 · sin(theta) ) ), theta=0..Pi ), phi=0..2·Pi ) :
|=
| > λeff := 1 + simplify( ( 3·v / (4·Pi) ) · ( j33 - i33 ) / 2 ) :
|=
| > # where v is the volume fraction of the compound droplet
| >

```
